# Supplementary material
Source: publisher figshare collection journal article supplement (https://acs.figshare.com/ndownloader/files/3915289)
Supplement: Supplementary file 1 [file 3915289]

Supporting Information

## Phosphorus removal by steel slag filters: modeling dissolution and precipitation kinetics to predict longevity

Dominique Claveau-Mallet\*

Benoît Courcelles

Yves Comeau

Polytechnique Montreal, Department of Civil, Geological and Mining Engineering, Montreal (Quebec), Canada H3C 3A7

Number of page: 1

Number of Table: 1

**Table S1.** Sensivity analysis for dispersivity with influent  $\text{o-PO}_4 = 27.7 \text{ mg P/L}$ , influent  $\text{NaHCO}_3 = 0$  and  $\text{HRT}_V = 8 \text{ h}$ .

| Dispersivity (cm) | Longevity (pore volumes) |
|-------------------|--------------------------|
| 0                 | 285                      |
| 1                 | 285                      |
| 2                 | 280                      |
| 5                 | 275                      |
